# Supplementary material for: Regulation of plasma lipid homeostasis by hepatic lipoprotein lipase in adult mice
Source: PubMed Central journal article supplement (PMC4918845; doi:10.1194/jlr.m065011), 2016-07
Supplement: 10.1194_M065011_jlr.M065011-1.pdf [file 10.1194_M065011_jlr.M065011-1.pdf]

*Supplementary Data:*

## **Regulation of Plasma Lipid Homeostasis by Hepatic Lipoprotein**

### **Lipase in Adult Mice**

Gan Liu<sup>1,2\*</sup>, Jun-Nan Xu<sup>1\*</sup>, Dong Liu<sup>3,1\*</sup>, Qingli Ding<sup>1</sup>, Meng-Na Liu<sup>3,1</sup>, Rong Chen<sup>2,4</sup>, Mengdi Fan<sup>1,5</sup>, Ye Zhang<sup>1,2</sup>, Chao Zheng<sup>5</sup>, Da-Jin Zou<sup>2,4</sup>, Jianxin Lyu<sup>3</sup>, Weiping J. Zhang<sup>1,2</sup>

<sup>1</sup>Department of Pathophysiology, <sup>2</sup>Obesity and Diabetes Research Center, Second Military Medical University, Shanghai 200433, China

<sup>3</sup>The Key Laboratory of Laboratory Medicine, Ministry of Education of China, Wenchou Medical University School of Laboratory Medicine and Life Sciences, Wenchou, Zhejiang 325035, China

<sup>4</sup>Department of Endocrinology, Changhai Hospital, Shanghai 200433, China

<sup>5</sup>Department of Endocrinology, the Second Affiliated Hospital, Wenchou Medical University, Wenchou, Zhejiang 325000, China

\* They contributed equally to the work.

Supplementary information:

- Methods
- Figures S1-S4

## Materials and Methods

**LPL activity assay.** Briefly, 10  $\mu$ l samples were mixed with 16  $\mu$ l anhydrous emulsion (6% triolein, 0.36% lecithin, 0.01%  $^3\text{H}$ -Triolein in glycerol), 74  $\mu$ l BSA heparin mixture (3% BSA, 0.005% heparin sodium, 0.2% NaCl, 0.3M Tris-HCl, pH 8.5), 10  $\mu$ l heat-inactivated fast rat serum and 90  $\mu$ l PBS, and incubated at 37  $^{\circ}\text{C}$  for 60 min. Then, 3.25 ml extraction solvent (21% methanol, 44% chloroform, 35% heptane) and 1.05 ml potassium carbonate-borate buffer (0.7% potassium carbonate, 0.3% borate, pH10.5) were added to each tube, and the tubes were vortexed again and centrifuged at 3000g for 15 min. One ml of the upper aqueous phase were removed, mixed with 4 ml of scintillator liquid, and counted in a spectrometer (Beckman LS 6500). To abolish LPL activity, samples were incubated with 1M NaCl, and LPL activities were obtained by total enzyme activities subtracted NaCl-treated enzyme activities.

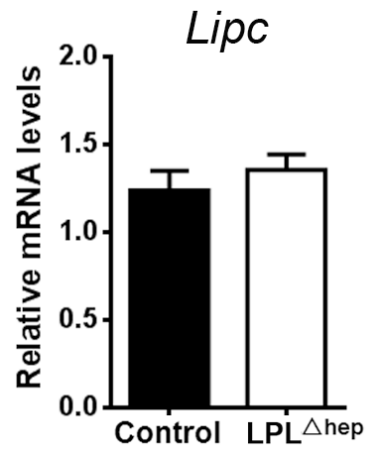

**Supplementary Fig.S1. Deletion of hepatic *Lpl* did not affect the expression levels of *Lipc* mRNA in the liver.** *Lipc* mRNA levels were detected by quantitative RT-PCR, and normalized by 36B4 as internal control. n=5 per group. P>0.05 vs control.

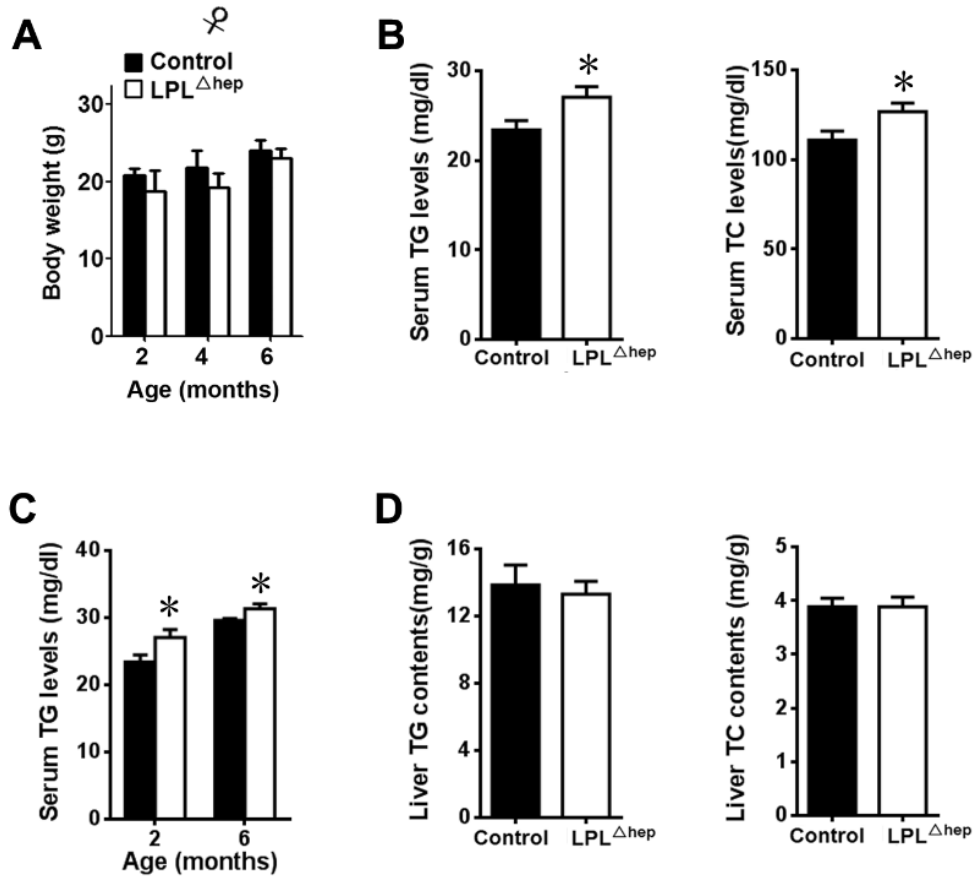

**Supplementary Fig.S2. Disruption of liver LPL altered plasma lipid metabolism in female mice.** The control and *Lpl*<sup>Δhep</sup> female mice at the age of 2~6 months were fed normal chow diet. **(A)** Body weight was not affected at the age of 2~6 months. **(B)** Fasting plasma TG and TC levels at the age of 2 months. **(C)** Fasting plasma TG levels at the indicated ages. **(D)** The TG and TC contents in the liver were not affected at 2 months of age by the deletion of hepatic *Lpl*. The mice were fasted for 6h. Results represent the mean ± SEM. \*,  $p < 0.05$  vs. control,  $n = 6-8$  for each group.

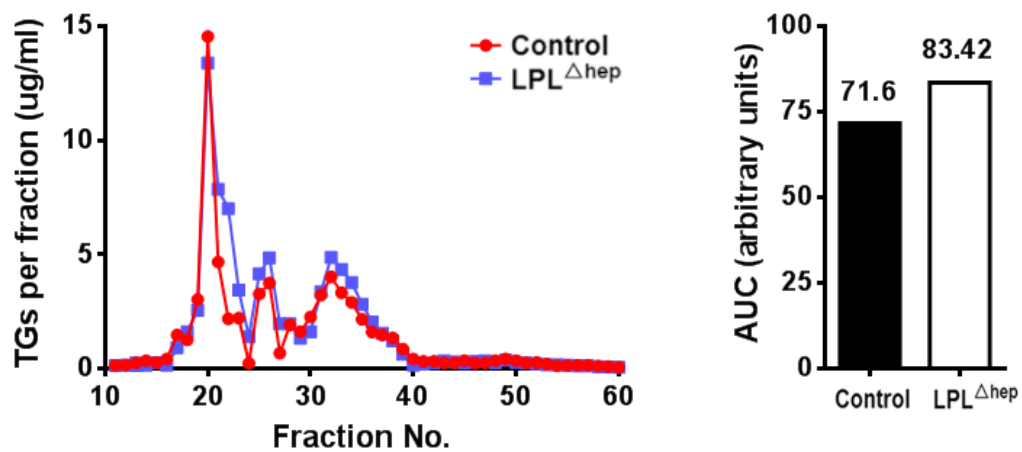

**Supplementary Fig. S3. TG profile in plasma lipoprotein.** Plasma samples pooled from 5 mice of each group were resolved by Superose 6 column, and the eluates collected in 0.5 ml by fractions were determined for TG contents. Area under curve (AUC) was plotted with the indicated values.

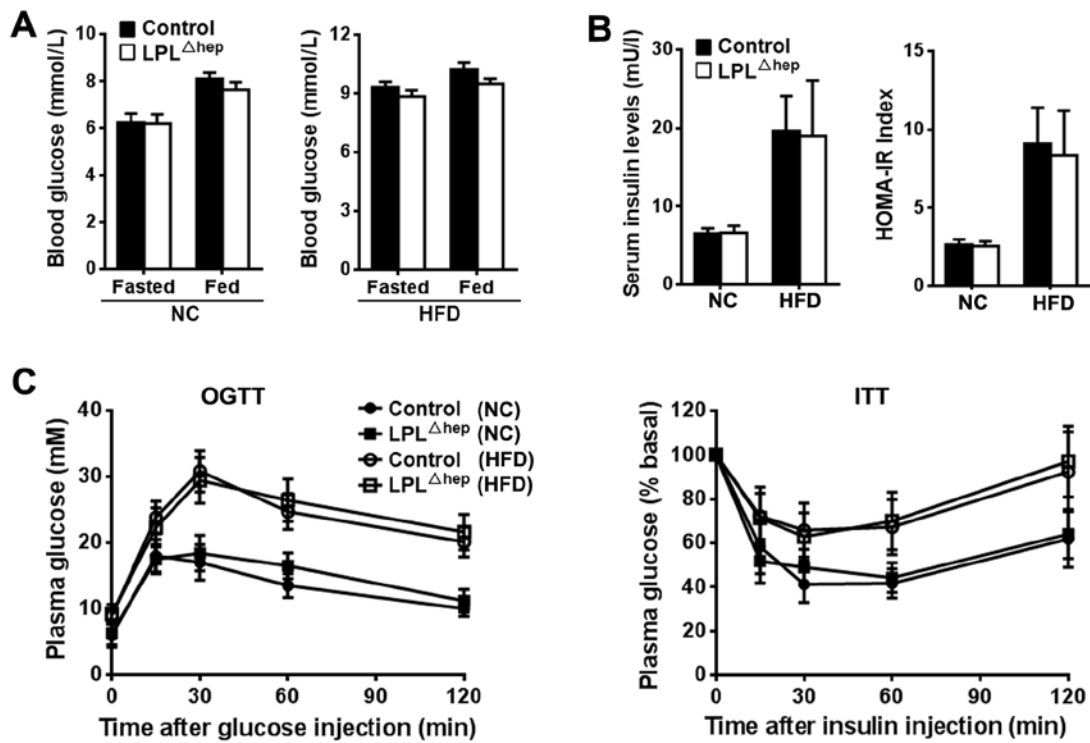

**Supplementary Fig.S4. Deletion of liver LPL did not affect glucose homeostasis.** The male control and mutant mice were fed the normal chow (NC) or high-fat diet (HFD) for 3 months. **(A)** Blood glucose levels under fasted or fed condition. **(B)** Fasting plasma insulin levels and HOMA-IR index of chow-fed mice. **(C)** Oral glucose tolerance test and insulin tolerance test showed that deletion of hepatic Lpl did not alter glucose metabolism of the mice on the normal chow or high-fat diet. The mice were administered with glucose (2g/kg body weight) by gavage or i.p. injected with 0.75U/kg of insulin, and their blood glucose levels were determined at the indicated time points. Results represent the mean  $\pm$  SEM. n=4-6 each.
